# Supplementary material
Source: HighWire-hosted journal article supplement (https://www.rcpjournals.org/highwire/filestream/10660/field_highwire_adjunct_files/1/Illingworth_Supplementary_S2.pdf)
Supplement: Illingworth_Supplementary_S2.pdf [file Illingworth_Supplementary_S2.pdf]

## Since September 2016, Patient Safety Collaboratives.....

Improvement

..have engaged with more than **2,198** organisations, including:

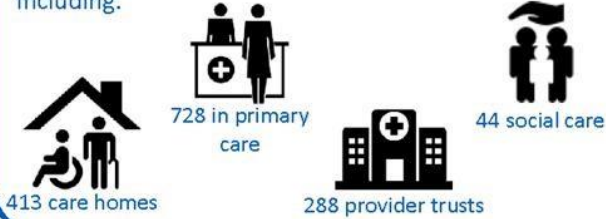

..trained **19,463** people as part of QI capability building including:

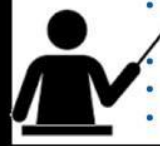

- 5,472 in measurement for improvement
- 2,943 in cultural awareness
- 2,705 in human factors
- 1,712 in safety leadership

..started **914** QI projects and completed **349** of them

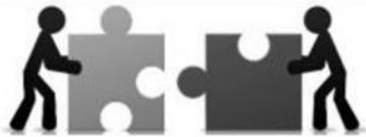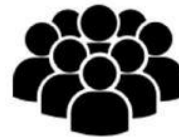

..recruited over **3,000** patient safety champions, Q members and QI experts
